# Supplementary material
Source: PubMed Central journal article supplement (PMC9869664)

**Supporting Information for**  
**“Targeted proteomic analysis of small GTPases in radioresistant**  
**breast cancer cells”**

Zi Gao<sup>§</sup>, Yen-Yu Yang<sup>§</sup>, Ming Huang<sup>†</sup>, Tianyu F. Qi<sup>†</sup>, Handing Wang<sup>§</sup>, and Yinsheng Wang<sup>§,†,\*</sup>

<sup>§</sup>*Department of Chemistry, University of California Riverside, Riverside, CA, 92521-0403, United States*

<sup>†</sup>*Environmental Toxicology Graduate Program, University of California Riverside, Riverside, CA, 92521-0403, United States*

\*Corresponding author: E-mail: Yinsheng.Wang@ucr.edu

**Table of Contents:**

| <b>Contents</b>                                                                                                                                                | <b>Pages</b> |
|----------------------------------------------------------------------------------------------------------------------------------------------------------------|--------------|
| <b>Table S1.</b> Primers for real-time qPCR and oligos of shRNA.                                                                                               | S2           |
| <b>Table S2.</b> Quantification results of small GTPase proteins in MDA-MB-231/C5 and MCF7/C6 pairs of breast cancer cells.                                    | In Excel     |
| <b>Figure S1.</b> MRM traces, Western blot and quantification results of IFT27                                                                                 | S3           |
| <b>Figure S2.</b> Real-time PCR results of mRNA expression levels of <i>IFT27</i> and <i>ARFRP1</i> in MDA-MB-231/C5 and MCF7/C6 pairs of breast cancer cells. | S4           |
| <b>Figure S3.</b> Western blot validation results of ARFRP1 stable knockdown in MCF7 and results of clonogenic survival assay.                                 | S5           |

**Table S1: Primers and Oligonucleotide Sequences**

| <b>Gene</b>   |                             | <b>Oligonucleotides</b>     |
|---------------|-----------------------------|-----------------------------|
| ARFRP1        | shRNA-1                     | CGAAGACAAACTTTCCTCTAT       |
|               | shRNA-2                     | CCTCTCAATCCCTGACATCAA       |
|               | shRNA-3                     | GCAGTCTTTGTGGGACAAGTA       |
| <hr/>         |                             |                             |
| <b>Genes</b>  | <b>qPCR Forward primers</b> | <b>qPCR Reverse primers</b> |
| <i>ARFRP1</i> | GTACAAGTACATGTTTCAGA        | TCCTGGGCCTGGACAATGCT        |
| <i>IFT27</i>  | GCTCTTGTCCTCTGGGTACG        | GTCTCCCGTGTCAGGAACTG        |

**Figure S1.** IFT27 is up-regulated in the radio-resistant lines of MDA-MB-231 and MCF7 cells. (A) MRM traces of a representative peptide (CILAGDPAVGK), where the underlined C represents carbamidomethylated cysteine, from IFT27 in MDA-MB-231/C5 and MCF7/C6 pairs of breast cancer cells. (B) Western blot for validating MRM results for IFT27 in MDA-MB-231/C5 and MCF7/C6 pairs of cells. (C) Relative levels of expression of IFT27 protein in the two pairs of cell lines as obtained from MRM and Western blot analyses. Error bars represent S.D. (n=3).

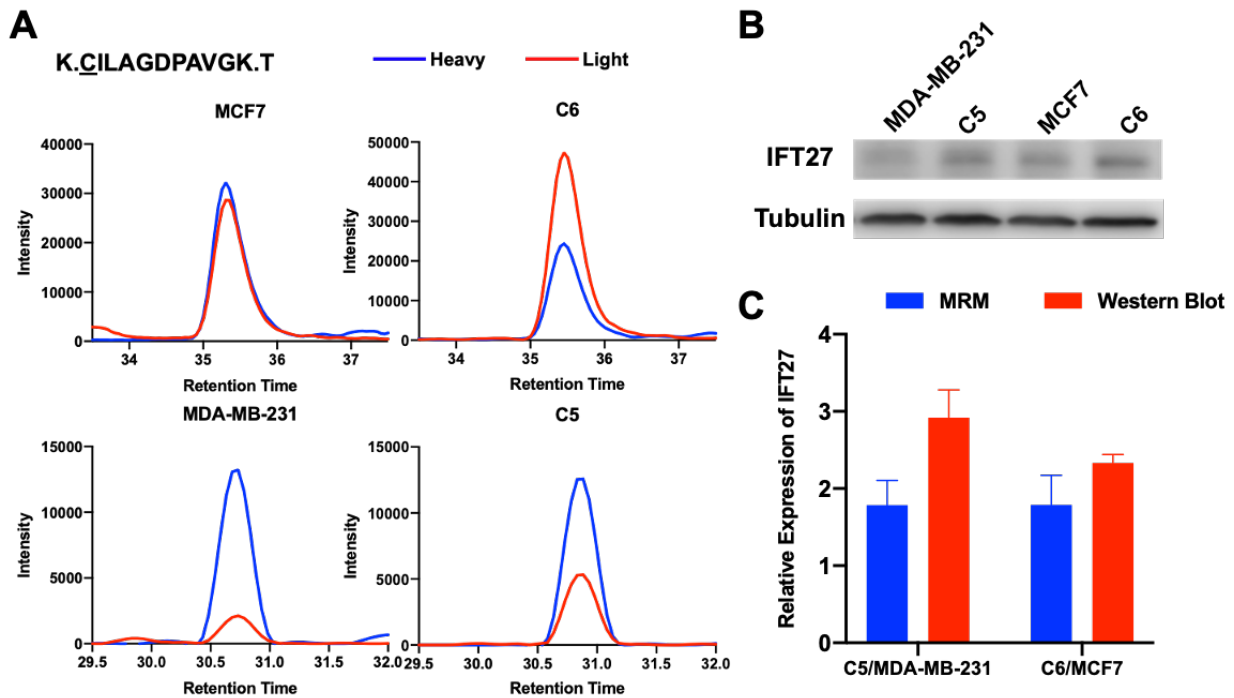

**Figure S2.** Real-time qPCR showing the mRNA expression levels of *IFT27* and *ARFRP1* genes in MDA-MB-231/C5 and MCF7/C6 pairs of breast cancer cells. Shown are  $\text{Log}_2$  ratio of expression levels in radioresistant over parental cell lines. The data represent the mean  $\pm$  S.D. of results obtained from three biological replicates.

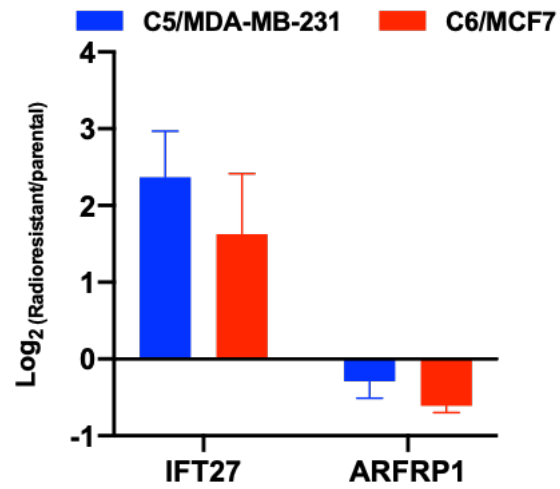

**Figure S3.** Down-regulation of ARFRP1 led to elevated radioresistance in MCF7 cells. (A) Validation of knockdown efficiency of ARFRP1 in MCF7 cells by Western blot analysis. (B) Survival rates of MCF7 cells treated with control or ARFRP1 shRNA and exposed with the indicated doses of  $\gamma$  rays. Error bars represent S.D. of results from three independent experiments.  $p$  values were calculated using unpaired, two-tailed Student's  $t$ -test: \*\*\*,  $p < 0.001$ .

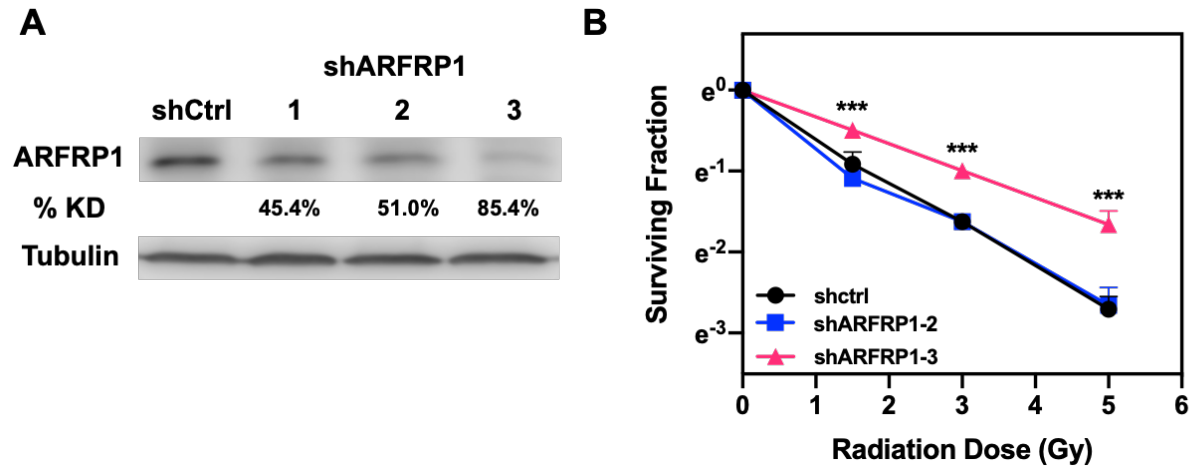

Supplement: NIHMS1866268-supplement-Supplementary_Figures.pdf [file NIHMS1866268-supplement-Supplementary_Figures.pdf]
